# Supplementary material
Source: PubMed Central journal article supplement (PMC2763617)
Supplement: NIHMS139549-supplement-1.pdf [file NIHMS139549-supplement-1.pdf]

Sup TABLE1

Supplemental Table 1. Clinicopathologic features of CRC probands stratified by MSI status. The families of probands with MSI-H tumors who met Amsterdam I and II criteria were removed from this subset analysis.

|                                                                                            | MSS    |      | MSI-L  |      | MSI-H  |      | OR (95%CI)       |
|--------------------------------------------------------------------------------------------|--------|------|--------|------|--------|------|------------------|
|                                                                                            | Wgt N* | %**  | Wgt N* | %**  | Wgt N* | %**  | MSI-H vs MSS     |
| <b>Age at Diagnosis</b>                                                                    |        |      |        |      |        |      |                  |
| <40                                                                                        | 153    | 3.1  | 22     | 2.5  | 47     | 5.3  | 1                |
| 40-49                                                                                      | 674    | 13.7 | 125    | 13.9 | 93     | 10.4 | 0.45 (0.24,0.84) |
| 50-59                                                                                      | 1480   | 30.0 | 252    | 27.8 | 130    | 14.6 | 0.29 (0.16,0.53) |
| 60-69                                                                                      | 1709   | 34.6 | 271    | 30.0 | 361    | 40.6 | 0.69 (0.38,1.25) |
| 70+                                                                                        | 921    | 18.7 | 234    | 25.9 | 259    | 29.1 | 0.92 (0.5,1.69)  |
| heterogeneity p-value                                                                      |        |      |        |      |        |      | <0.0001          |
| <b>Sex</b>                                                                                 |        |      |        |      |        |      |                  |
| Female                                                                                     | 2116   | 42.9 | 341    | 37.7 | 489    | 55.0 | 1                |
| Male                                                                                       | 2814   | 57.1 | 564    | 62.3 | 401    | 45.0 | 0.62 (0.44,0.85) |
| heterogeneity p-value                                                                      |        |      |        |      |        |      | 0.0037           |
| <b>Site of Tumor</b>                                                                       |        |      |        |      |        |      |                  |
| Proximal                                                                                   | 1234   | 25.0 | 305    | 33.7 | 581    | 65.3 | 1                |
| Distal                                                                                     | 3281   | 66.5 | 487    | 53.8 | 235    | 26.4 | 0.15 (0.1,0.22)  |
| Other                                                                                      | 421    | 8.5  | 113    | 12.5 | 74     | 8.3  | 0.37 (0.2,0.67)  |
| heterogeneity p-value                                                                      |        |      |        |      |        |      | <0.0001          |
| <b>Number of 1st Degree Relatives with CRC</b>                                             |        |      |        |      |        |      |                  |
| 0                                                                                          | 4024   | 81.5 | 756    | 83.6 | 725    | 81.5 | 1                |
| 1                                                                                          | 774    | 15.7 | 134    | 14.8 | 136    | 15.3 | 0.98 (0.69,1.37) |
| 2                                                                                          | 117    | 2.4  | 13     | 1.4  | 24     | 2.7  | 1.12 (0.58,2.18) |
| 3+                                                                                         | 22     | 0.5  | 2      | 0.2  | 5      | 0.6  | 1.24 (0.25,6.14) |
| heterogeneity p-value                                                                      |        |      |        |      |        |      | 0.9728           |
| <b>Number of 1st Degree Relatives with Endometrial Cancer</b>                              |        |      |        |      |        |      |                  |
| 0                                                                                          | 4793   | 97.1 | 891    | 98.5 | 864    | 97.1 | 1                |
| 1+                                                                                         | 144    | 2.9  | 14     | 1.5  | 26     | 2.9  | 0.99 (0.54,1.81) |
| heterogeneity p-value                                                                      |        |      |        |      |        |      | 0.9613           |
| <b>Number of 1st Degree Relatives with Any Other Cancer than CRC or Endometrial Cancer</b> |        |      |        |      |        |      |                  |
| 0                                                                                          | 2239   | 45.4 | 410    | 45.4 | 359    | 40.4 | 1                |
| 1                                                                                          | 1672   | 33.9 | 303    | 33.5 | 330    | 37.1 | 1.23 (0.85,1.78) |
| 2                                                                                          | 754    | 15.3 | 106    | 11.7 | 145    | 16.3 | 1.2 (0.76,1.88)  |
| 3+                                                                                         | 272    | 5.5  | 86     | 9.5  | 56     | 6.3  | 1.29 (0.67,2.49) |
| heterogeneity p-value                                                                      |        |      |        |      |        |      | 0.6532           |

Sup TABLE1

| <b>Had 1st Degree Relatives with both CRC and Endometrial Cancer</b> |      |             |     |             |     |                             |
|----------------------------------------------------------------------|------|-------------|-----|-------------|-----|-----------------------------|
| <b>No</b>                                                            | 4896 | <b>99.2</b> | 903 | <b>99.9</b> | 882 | <b>99.1</b> 1               |
| <b>Yes</b>                                                           | 41   | <b>0.8</b>  | 1   | <b>0.1</b>  | 8   | <b>0.9</b> 1.04 (0.4,2.69)  |
| heterogeneity p-value                                                |      |             |     |             |     | 0.9338                      |
| <b>Bethesda</b>                                                      |      |             |     |             |     |                             |
| <b>No</b>                                                            | 3150 | <b>75.1</b> | 626 | <b>69.2</b> | 524 | <b>58.9</b> 1               |
| <b>Yes</b>                                                           | 1787 | <b>71.4</b> | 279 | <b>30.8</b> | 365 | <b>41.1</b> 1.23 (0.9,1.67) |
| heterogeneity p-value                                                |      |             |     |             |     | 0.1944                      |

\* Per text, these are estimated numbers of probands corrected for proband weighting based on

\*\* Proportion of covariates within each tumor MSI category (MSS/MSI-L/MSI-H) are calculated
