# Supplementary material
Source: PubMed Central journal article supplement (PMC2763617)
Supplement: NIHMS139549-supplement-2.pdf [file NIHMS139549-supplement-2.pdf]

Supplemental Table 2. Overview of the similarities and differences between MSI-L and MSI-H tumors.

|                                     | <b>MSI-L</b>                                                        | <b>MSI-H</b>                                                                                          |
|-------------------------------------|---------------------------------------------------------------------|-------------------------------------------------------------------------------------------------------|
| <b>Proportion of tumors</b>         | 13%                                                                 | 14%                                                                                                   |
| <b>Anatomic location</b>            | proximal slightly > distal                                          | proximal much greater > distal                                                                        |
| <b>Male: Female ratio</b>           | Same or higher than for MSS tumors                                  | Lower than for MSS tumors                                                                             |
| <b>Age at diagnosis</b>             | Similar to MSS tumors, with suggestion of increase >70 years of age | U-shaped pattern of risk relative to MSS tumors                                                       |
| <b>Fam Hx of CRC</b>                | Similar to MSS tumors                                               | Much more frequent than MSS tumors. After removal of Amsterdam families, same frequency as MSS tumors |
| <b>Fam Hx of endometrial cancer</b> | Same or slightly more frequent than MSS tumors                      | Much more frequent than MSS tumors                                                                    |
